# Supplementary material
Source: Springer Nature journal article supplement (https://www.springermedizin.de/resource/supplementary/12884_2011_582_MOESM1_ESM.pdf/9457944)
Supplement: MOESM1 [file 9457944]

## Generation

Qualitative studies generating [1, 2] 42 items

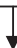

Literature review generating 3 new items

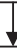

Focus group interviews with 8 midwives generated 1 new item

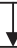

## Evaluation

Expert panel evaluation added 2 new items and excluded 2 items  
Total 46 items

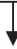

Pilot group of 8 fathers answered and evaluated the items

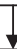

Revision of the instrument after expert groups second revision  
Total 35 items

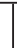

## Validation

Instrument sent out to 306 fathers, for validation

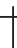

Revision of the instrument: 4 items excluded due to high ceiling effects and 2 due to high missing values.

Total 29 items

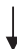

Factor analysis of 29 items: 7 items loading equally on different factors or with low factor loadings were excluded.  
Total 22 items

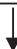

Multitrait analysis for confirmation of factor structure

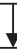

Known groups, discriminant validity
